# Supplementary material for: Ir/Ni–NiO/CNT composites as effective electrocatalysts for hydrogen oxidation
Source: Royal Society of Chemistry journal article supplement (doi:10.1039/d2ta07417f), 2022-11-16
Supplement: d2ta07417f1.pdf [file d2ta07417f1.pdf]

**Electronic Supplementary Material (ESI) for Journal of Materials Chemistry A.**  
**This journal is © The Royal Society of Chemistry 2022**

**Ir/Ni-NiO/CNT Composites as Effective Electrocatalysts for Hydrogen Oxidation**

Xiafang Ji,<sup>a</sup> Peng Chen,<sup>a</sup> Yuanjun Liu,<sup>b</sup> Zhenyuan Ji,<sup>a</sup> Hongbo Zhou,<sup>a,\*</sup> Cairao Chen,<sup>a</sup> Xiaoping Shen,<sup>a</sup> Xiaoqi Fu,<sup>a</sup> and Guoxing Zhu<sup>a,\*</sup>

<sup>a</sup>School of Chemistry and Chemical Engineering, Jiangsu University, Zhenjiang 212013, China.

<sup>b</sup>School of Environmental and Chemical Engineering, Jiangsu University of Science and Technology, Zhenjiang 202018, China

Corresponding authors:

Email: [zhouhb@ujs.edu.cn](mailto:zhouhb@ujs.edu.cn); [zhuguoxing@ujs.edu.cn](mailto:zhuguoxing@ujs.edu.cn)

**Supplementary methods**

HOR polarization curves at different rotating rates (2500, 1600, 900, and 400 rpm) were conducted to extract the kinetic current density ( $j^k$ ) of each catalyst from the Koutecky-Levich equation (Eq. 1),<sup>s1-s3</sup>

$$\frac{1}{j} = \frac{1}{j^k} + \frac{1}{j^d} = \frac{1}{j^k} + \frac{1}{Bc_0\omega^{1/2}} \quad \text{Eq. 1}$$

where  $j$  is the measured current density,  $j^d$  is the diffusion limited current density,  $B$  is the Levich constant,  $c_0$  is the solubility of  $\text{H}_2$  ( $7.33 \times 10^{-4} \text{ mol L}^{-1}$ ),  $\omega$  is the rotating speed, respectively.

Among them,  $B$  could be calculated from Eq. 2,

$$B = 0.62nFD^{2/3}\nu^{-1/6} \quad \text{Eq. 2}$$

where  $n$  is the electron transfer number,  $F$  is the Faraday constant ( $96485 \text{ C mol}^{-1}$ ),  $D$  is the diffusivity of  $\text{H}_2$  ( $3.7 \times 10^{-5} \text{ cm}^2 \text{ s}^{-1}$ ), and  $\nu$  is the kinematic viscosity ( $1.01 \times 10^{-2} \text{ cm}^2 \text{ s}^{-1}$ ).

Exchange current density ( $j^0$ ) was deduced from the Butler-Volmer equation (Eq. 3),

$$j^0 = \frac{RTj}{F\eta} \quad \text{Eq. 3}$$

$j^0$  can be obtained by fitting the kinetic current into the linearized Butler-Volmer equation (Eq. 3), where  $R$  is the universal gas constant ( $8.314 \text{ J mol}^{-1} \text{ K}^{-1}$ ),  $T$  is the operating temperature ( $298.15 \text{ K}$ ),  $F$  is the Faraday constant ( $96485 \text{ C mol}^{-1}$ ).

Electrochemical active surface areas (ECSAs) were estimated via Cu underpotential deposition (UPD) stripping for all samples after HOR tests.<sup>s4</sup> The catalysts were firstly cycled in Ar-saturated  $0.1 \text{ M H}_2\text{SO}_4$  solution to guarantee a repeatable voltammogram curve as the background, and then were kept at  $0.30 \text{ V}$  (vs RHE) for  $100 \text{ s}$  in an Ar-saturated  $0.1 \text{ M H}_2\text{SO}_4$  solution containing  $2 \text{ mM CuSO}_4$ . UPD Cu oxidation polarization curve was performed from  $0.30$  to  $1.10 \text{ V}$  with a scan rate of  $10 \text{ mV s}^{-1}$ . The ECSAs were calculated via Eq. 4,

$$ECSA = \frac{Q_{Cu}}{Q_s m_{metal}} \quad \text{Eq. 4}$$

where  $Q_{Cu}$  stands the measured integral charge,  $Q_s$  represents the surface charge density of  $420 \mu\text{C cm}_{metal}^{-2}$  for monolayer adsorption of Cu-UPD stripping,  $m_{metal}$  is the mass of the metal on GC.

## Supplementary figures

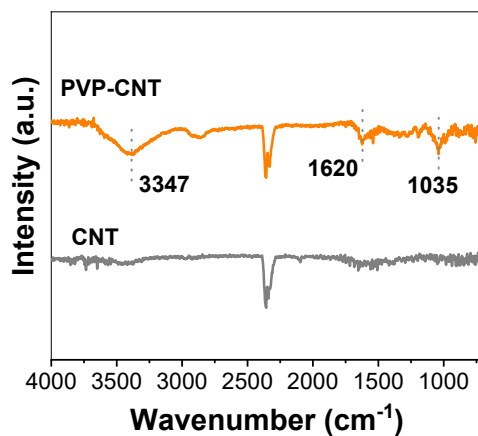

**Fig. S1.** FT-IR spectra of PVP-CNT and pristine CNT.

The PVP-functionalized CNTs were examined by FT-IR spectrum, which presents three main absorption peaks. The peak at 3347 cm<sup>-1</sup> is related to the O-H stretching vibrations of hydroxyl groups. The peaks at 1620 and 1035 cm<sup>-1</sup> are relevant to the C=O and C-N stretching vibrations of the carboxyl moieties. The existence of polar functional groups indicates the improvement of hydrophilicity and the successful functionalization of CNTs.

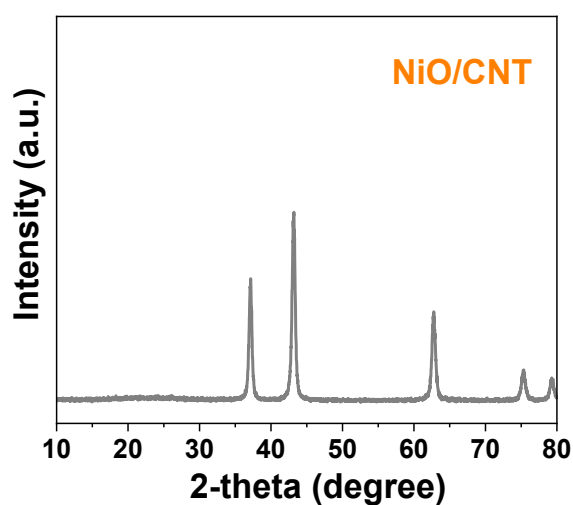

**Fig. S2.** XRD pattern of NiO/CNT product.

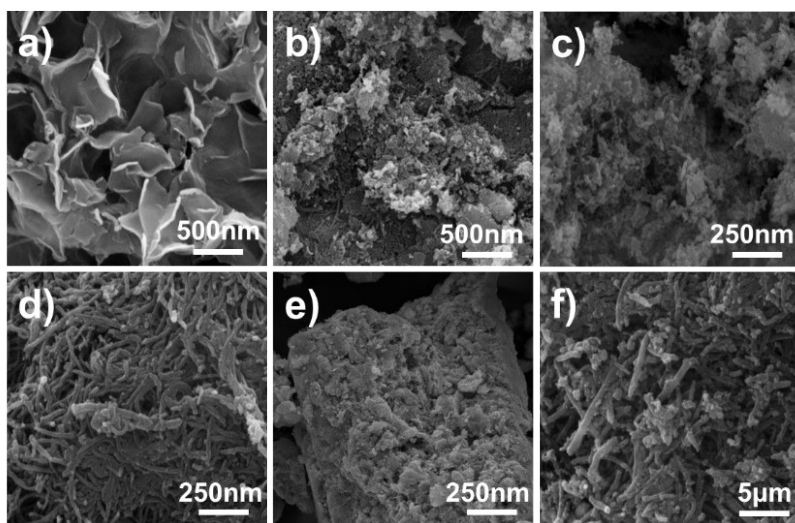

**Fig. S3.** SEM images for a) Ni(OH)<sub>2</sub>/CNT, b) NiO/CNT, c) *tre*-NiO/CNT, d) Ir/CNT and e-f) Ir/Ni-NiO/CNT.

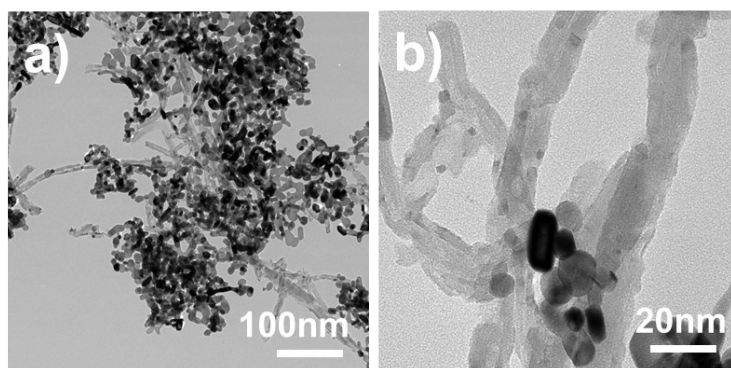

**Fig. S4.** TEM images of *tre*-NiO/CNT.

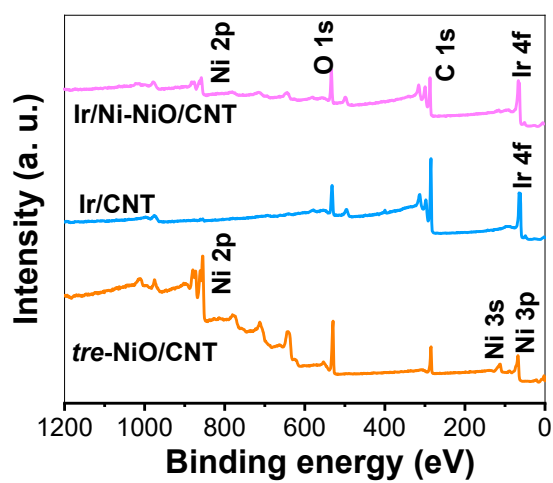

**Fig. S5.** The survey scan XPS spectra of *tre*-NiO/CNT, Ir/CNT, and Ir/Ni-NiO/CNT.

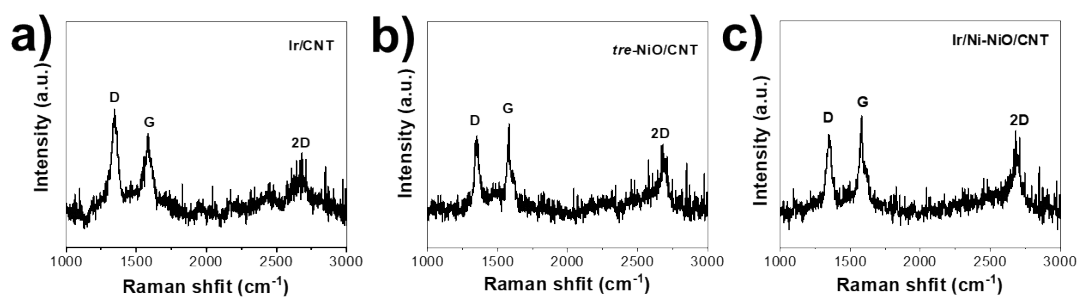

**Fig. S6.** Raman spectra of a) Ir/CNT. b) *tre*-NiO /CNT. c) Ir/Ni-NiO/CNT. The higher G and 2D band intensity of catalysts suggests a higher graphitization degree.

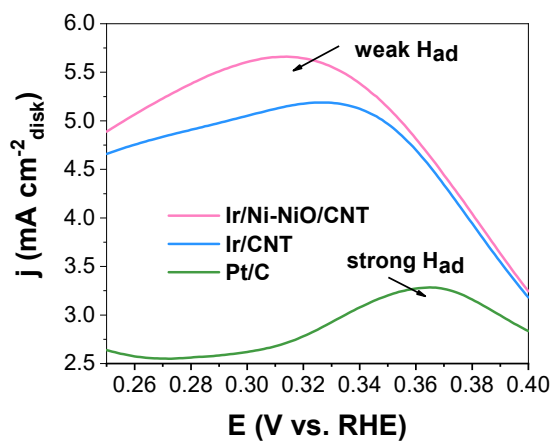

**Fig. S7.** Enlarged CV curves of Ir/Ni-NiO/CNT, Ir/CNT and Pt/C in Ar-saturated 0.1M KOH solution.

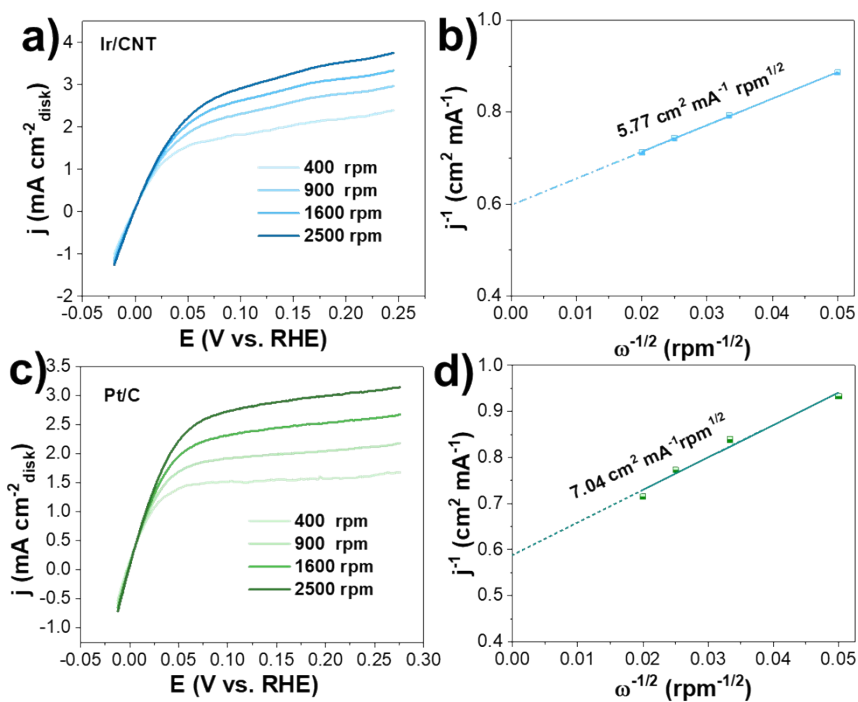

**Fig. S8.** HOR polarization curves in  $\text{H}_2$ -saturated 0.1 M KOH at various rotating rates and the corresponding Koutecky-Levich plots at 25 mV (vs RHE). a-b) Ir/CNT. c-d) Pt/C.

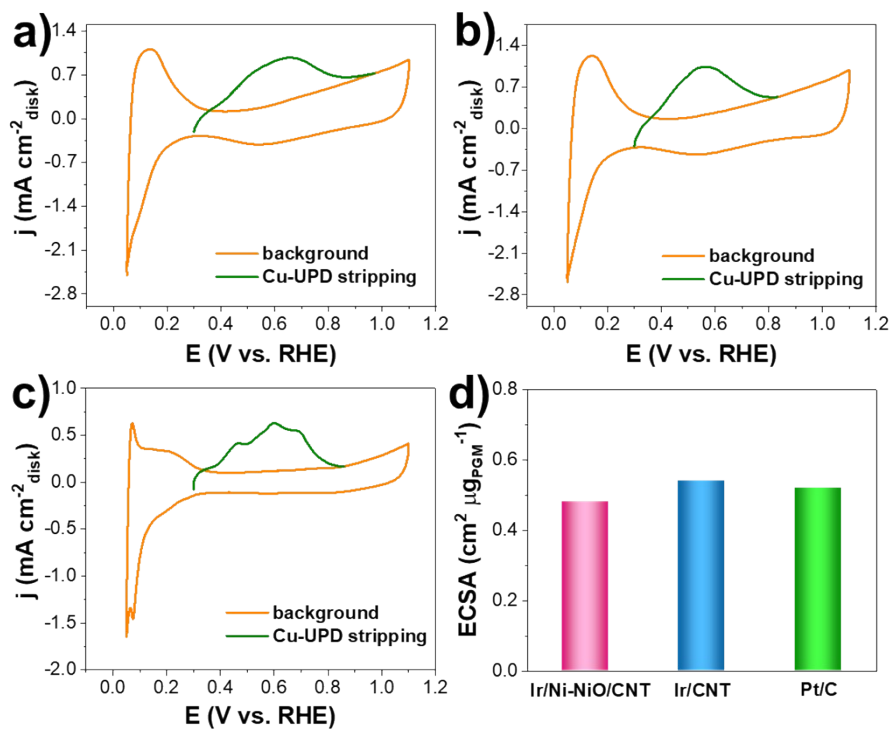

**Fig. S9.** Cu-UPD stripping voltammograms of Ir/Ni-NiO/CNT a), Ir/CNT b) and Pt/C c). The scan rates are  $10 \text{ mV s}^{-1}$ . d) ECSAs of these three catalysts.

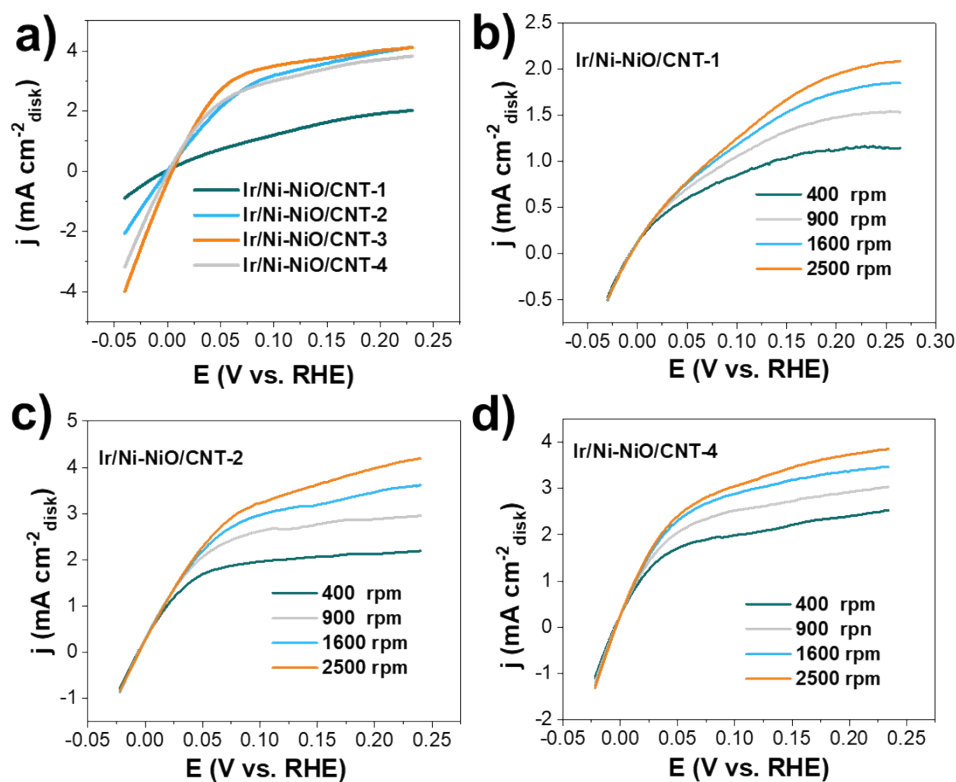

**Fig. S10.** a) HOR polarization curves of Ir/Ni-NiO/CNT at different loadings of Ir species and the corresponding HOR polarization curves in H<sub>2</sub>-saturated 0.1 M KOH at various rotating rates. b) Ir/Ni-NiO/CNT - 1, c) Ir/Ni-NiO/CNT - 2 and d) Ir/Ni-NiO/CNT - 4.

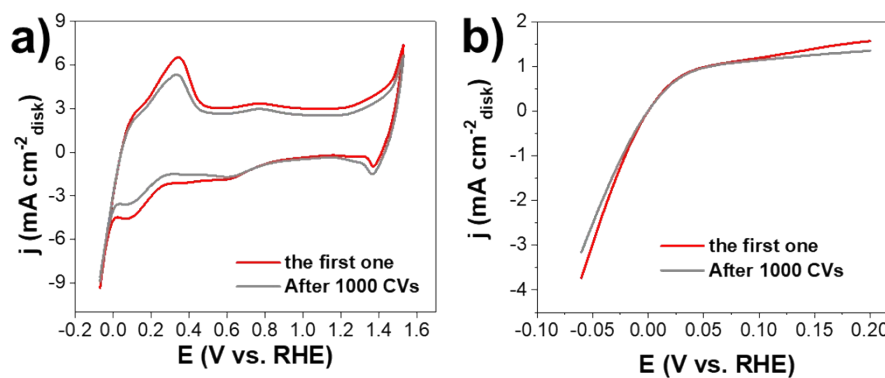

**Fig. S11.** a) CV curves in H<sub>2</sub>-saturated 0.1 M KOH solution at a scan rate of 50 mV s<sup>-1</sup>. b) HOR polarization curves in H<sub>2</sub>-saturated 0.1 M KOH solution with a scan rate of 10 mV s<sup>-1</sup> at a rotating rate of 2500 rpm of Ir/Ni-NiO/CNT before and after 1000 CV cycles.

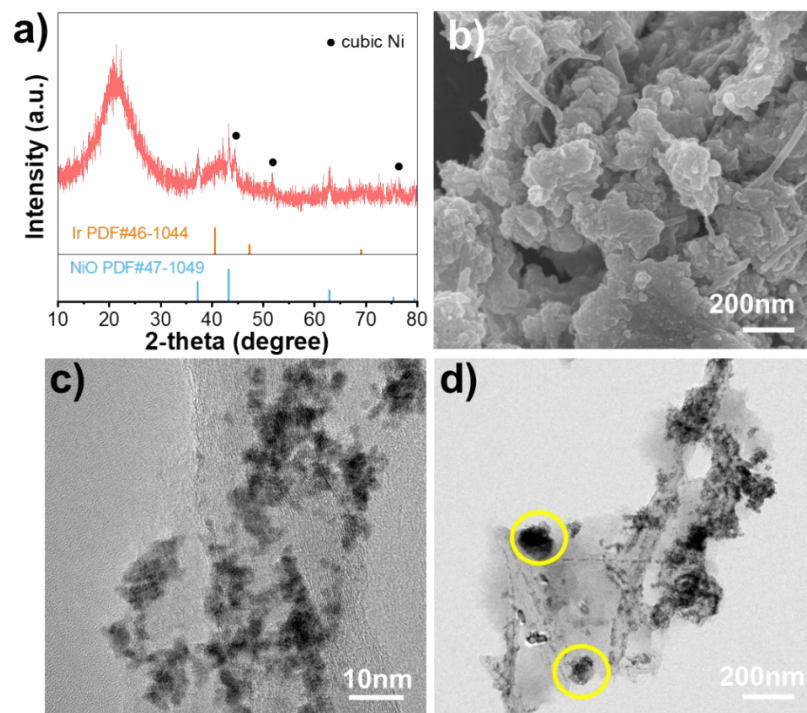

**Fig. S12.** Characterization results of the used catalyst for HOR. a) XRD pattern, b) SEM image, c- d) TEM images. The noted area shows the particle-like Ir/Ni-NiO unit.

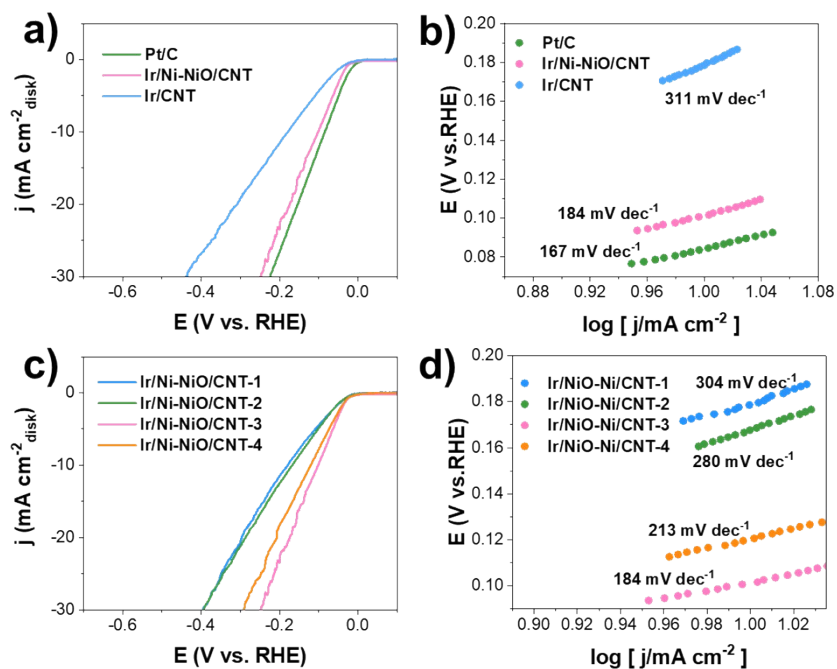

**Fig. S13.** a, c) HER polarization curves of Ir/Ni-NiO/CNT and other electrocatalysts. b, d) the corresponding HER Tafel slopes.



## Supplementary tables

**Table S1.** ICP-AES data of different materials.

| Catalysts           | Ir(wt%) | Ni(wt%) |
|---------------------|---------|---------|
| <i>tre</i> -NiO/CNT | /       | 43.6%   |
| Ir/CNT              | 20.7%   | /       |
| Ir/Ni-NiO/CNT-1     | 2.0%    | 21.6%   |
| Ir/Ni-NiO/CNT-2     | 3.6%    | 16.1%   |
| Ir/Ni-NiO/CNT-3     | 9.17%   | 11.6%   |
| Ir/Ni-NiO/CNT-4     | 11.2%   | 2.07%   |

**Table S2.** Summary of ECSA,  $j^k$ ,  $j^0$ ,  $j^{k,m}$ ,  $j^{0,m}$  and  $j^{0,s}$  of various catalysts.

| Catalysts     | ECSA<br>( $\text{cm}^2 \mu\text{gIr}^{-1}$ ) | $j^k_{@50\text{mV}}$<br>( $\text{mA cm}_{\text{disk}}^{-2}$ ) | $j^{k,m}_{@50\text{mV}}$<br>( $\text{mA } \mu\text{gIr or Pt}^{-1}$ ) | $j^0$<br>( $\text{mA cm}_{\text{disk}}^{-2}$ ) | $j^{0,m}$<br>( $\text{A gIr or Pt}^{-1}$ ) | $j^{0,s}$<br>( $\mu\text{A cm}_{\text{Ir or Pt}}^{-2}$ ) |
|---------------|----------------------------------------------|---------------------------------------------------------------|-----------------------------------------------------------------------|------------------------------------------------|--------------------------------------------|----------------------------------------------------------|
| Ir/Ni-NiO/CNT | 0.48                                         | 4.63                                                          | 1.59                                                                  | 2.04                                           | 69.78                                      | 145                                                      |
| Ir/ CNT       | 0.54                                         | 2.99                                                          | 0.45                                                                  | 1.58                                           | 24.01                                      | 44                                                       |
| Pt/C          | 0.52                                         | 3.23                                                          | 0.51                                                                  | 1.59                                           | 25.00                                      | 48                                                       |

**Table S3.** Benchmark HOR activities and the relevant parameters of catalysts in alkaline electrolytes.

| Catalysts                            | Loading<br>( $\mu\text{g}_{\text{PGM}} \text{cm}_{\text{disk}}^{-2}$ ) | ECSA<br>( $\text{cm}^2 \mu\text{g}_{\text{PGM}}^{-1}$ ) | $j^0$<br>( $\text{mA cm}_{\text{disk}}^{-2}$ ) | $j^{k,m}$<br>( $\text{mA } \mu\text{gIr}^{-1}$ ) at<br>50 mV | Refs.     |
|--------------------------------------|------------------------------------------------------------------------|---------------------------------------------------------|------------------------------------------------|--------------------------------------------------------------|-----------|
| Ir/Ni-NiO/CNT                        | 29.46                                                                  | 0.48                                                    | 2.04                                           | 1.59                                                         | This work |
| Ir/CNT                               | 65.89                                                                  | 0.54                                                    | 1.58                                           | 0.45                                                         | This work |
| Ir/C                                 | 2.44                                                                   | 0.49                                                    | 0.67                                           | 0.67                                                         | S5        |
| IrRu Nanowires/C                     | 33.6                                                                   | 0.528                                                   | 0.126                                          | 1.41                                                         | S6        |
| Ir <sub>9</sub> Ru <sub>1</sub> /C   | 3.5                                                                    | /                                                       | 0.9                                            | 0.37                                                         | S7        |
| Ir <sub>3</sub> PdRu <sub>6</sub> /C | 3.5                                                                    | /                                                       | 0.6                                            | 0.34                                                         | S7        |
| IrNi@Ir/C                            | 10                                                                     | 0.48                                                    | 1.22                                           | 1.12                                                         | S8        |
| IrNi/C                               | 10                                                                     | 0.41                                                    | 0.90                                           | 0.77                                                         | S8        |
| Ir/C                                 | 10                                                                     | 0.138                                                   | 0.53                                           | /                                                            | S2        |
| Pt/C                                 | 63.69                                                                  | 0.52                                                    | 1.59                                           | 0.51                                                         | This work |

### Supplementary references

- S1. W. C. Sheng, H. A. Gasteiger and S. H. Yang, *J. Electrochem. Soc.*, 2010, 157, B1529-B1536.
- S2. J. Zheng, Z. B. Zhuang, B. J. Xu and Y. S. Yan, *ACS Catal.*, 2015, 5, 4449-4455.
- S3. J. Durst, A. Siebel, C. Simon, F. Haschéet, J. Herranzal and H. A. Gasteiger, *Energy Environ Sci.*, 2014, 7, 2255-2260.
- S4. L. H. Fu, F. L. Yang, Y. C. Hu, Y. B. Li, S. G. Chen and W. Luo, *Sci. Bull.*, 2020, 65, 1735-1742.
- S5. Y. Yang, X. D. Sun, G. Q. Han, X. Liu, X. Y. Zhang, Y. F. Sun, M. Zhang, Z. Cao and Y. Sun, *Angew. Chem. Int. Ed.*, 2019, 58, 10644-10649.
- S6. B. W. Qin, H. M. Yu, X. Q. Gao, D. W. Yao, X. Y. Sun, W. Song, B. L. Yi and Z. G. Shao, *J. Mater. Chem. A.*, 2018, 6, 20374-20382.
- S7. H. S. Wang and H. D. Abruna, *J. Am. Chem. Soc.*, 2017, 139, 6807-6810.
- S8. D. Liu, S. Q. Lu, Y. R. Xue, Z. Guan, J. J. Fang, W. Zhu and Z. B. Zhuang, *Nano Energy*, 2019, 59, 26-32.
